# Supplementary material
Source: Springer Nature journal article supplement (https://www.springermedizin.de/resource/supplementary/12885_2008_1549_MOESM11_ESM.pdf/9472294)

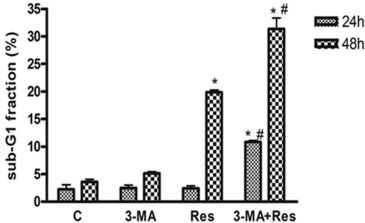

Supplement: MOESM11 [file 9472294]
